# Supplementary material for: Multicolor and multimodal luminescence in an Er3+ single-doped double perovskite for advanced anti-counterfeiting and encryption
Source: Royal Society of Chemistry journal article supplement (doi:10.1039/d4qi00549j), 2024-01-01
Supplement: d4qi00549j1.pdf [file d4qi00549j1.pdf]

## Supporting Information

### **Multicolor and multimodal luminescence in Er<sup>3+</sup> single-doped double perovskite for advanced anti-counterfeiting and encryption**

Sixia Li <sup>a,b</sup>, Peng Zhang <sup>a</sup>, Zhenbing Wang <sup>b</sup>, Yuzhu Yang <sup>a</sup>, Xuan Miao <sup>a</sup>, Weisheng  
Liu <sup>\* a,b</sup>

a Key Laboratory of Nonferrous Metal Chemistry and Resources, Utilization of  
Gansu Province and State Key Laboratory of Applied Organic Chemistry, College of  
Chemistry and Chemical Engineering, Lanzhou University, Lanzhou 730000, China

b College of Chemistry and Chemical Engineering, Qinghai Normal University,  
Xining 810016, China.

\*Corresponding author: Professor Weisheng Liu, E-mail: [liuws@lzu.edu.cn](mailto:liuws@lzu.edu.cn)

## Computational Methods

The spin-polarized density functional theories were carried out by using the Vienna Ab initio Simulation Package (VASP). The Perdew-Burke-Ernzerhof generalized-gradient approximation functional was used to describe the interaction between electrons. The energy cutoff was set to 400 eV. The Monkhorst-Pack k-points grids were set to be  $6 \times 4 \times 6$  during the calculations. The vacuum region was set to be  $15 \text{ \AA}$  in the z direction to prevent the interaction between two adjacent surfaces. The energy convergence was set to  $10^{-5}$  eV.

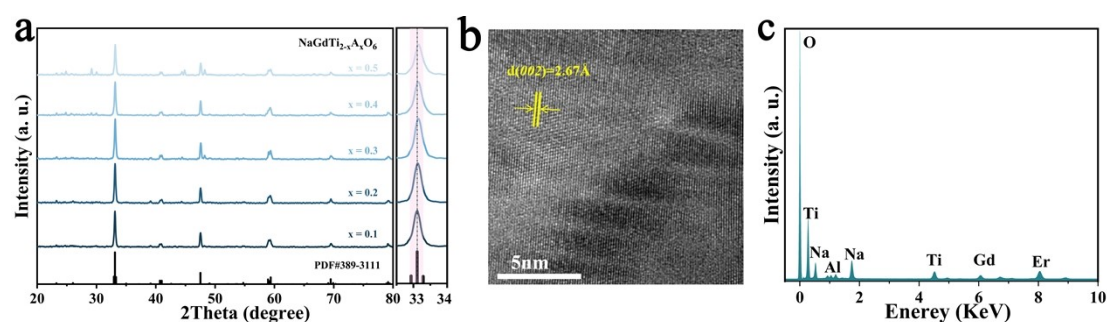

Figure S1. (a) XRD patterns with different  $\text{Al}^{3+}$  occupancy ratios of  $\text{NaGdTi}_{2-x}\text{Al}_x\text{O}_6$  ( $0.1 \leq x \leq 0.5$ ). (b) HRTEM image of NGTAO:  $\text{Er}^{3+}$ . (c) The EDS spectrum.

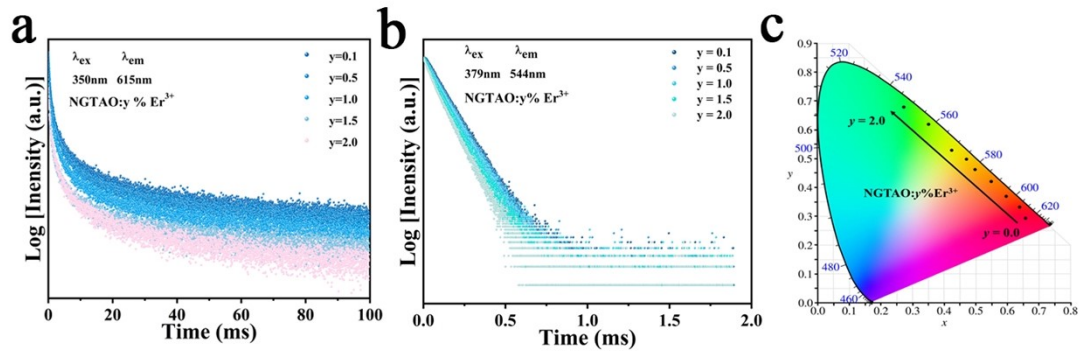

Figure S2. Luminescence decay curves of NGTAO: Er<sup>3+</sup> samples measured at room temperature under 350 nm (a) and 379 nm (b) excitation. (c) CIE coordinates of the concentration-dependent color of NGTAO: y%Er<sup>3+</sup> ( $0.0 \leq y \leq 2.0$ ).

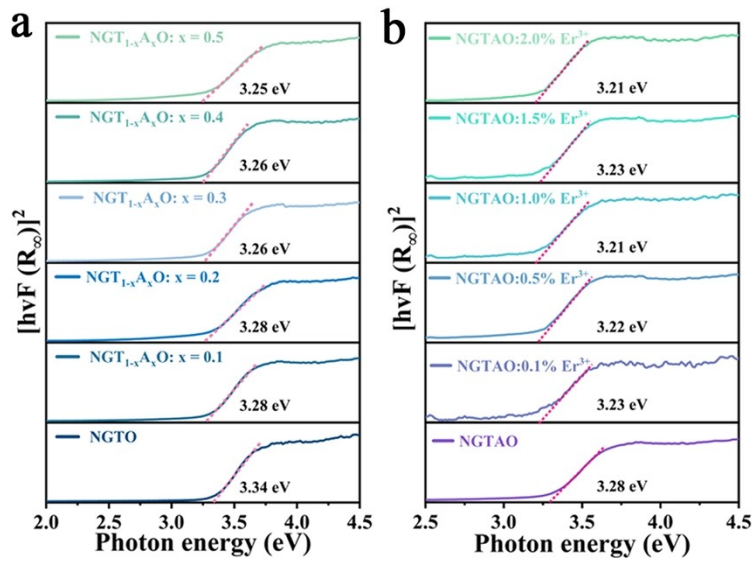

Figure S3. (a) The band gap values of NGTAO and (b) NGTAO: y%Er<sup>3+</sup>.

**Table S1.** The refined crystallographic data of the NGTAO sample.

| <b>Formula</b>                          | <b>NGTAO</b>                |
|-----------------------------------------|-----------------------------|
| <b>Space group name</b>                 | <i>Pnma</i> (62)            |
| <b>a (Å)</b>                            | 5.435                       |
| <b>b (Å)</b>                            | 7.646                       |
| <b>c (Å)</b>                            | 5.379                       |
| <b><math>\alpha</math></b>              | 90.000                      |
| <b><math>\beta</math></b>               | 90.000                      |
| <b><math>\gamma</math></b>              | 90.000                      |
| <b>Unit-cell volume (Å<sup>3</sup>)</b> | 223.534                     |
| <b>T/K</b>                              | 297                         |
| <b>Diffractometer</b>                   | Rigaku D/Max-2400           |
| <b>Radiation/Å</b>                      | Cu-Ka ( $\lambda= 1.5405$ ) |
| <b>Absorption correction</b>            | multi-scan                  |
| <b>2<math>\theta</math> range/°</b>     | 20-80                       |
| <b>R<sub>wp</sub></b>                   | 13.62%                      |
| <b>R<sub>p</sub></b>                    | 9.66%                       |
| <b><math>\chi^2</math></b>              | 0.69                        |

**Table S2.** The fitting parameters of NGTAO: Er<sup>3+</sup> decay curves.

| <b>Sample</b> | <b><math>\tau_1</math></b> | <b><math>\tau_2</math></b> | <b><math>\tau_3</math></b> | <b><math>B_1</math></b> | <b><math>B_2</math></b> | <b><math>B_3</math></b> | <b><math>\tau/\text{ms}</math></b> |
|---------------|----------------------------|----------------------------|----------------------------|-------------------------|-------------------------|-------------------------|------------------------------------|
| NGTAO         | 514.41                     | 2816.09                    | 18129.33                   | 3252.90                 | 1218.92                 | 321.90                  | 10.63                              |
| NGTAO:0.1%    | 2497.34                    | 411.46                     | 974.22                     | 2503.44                 | 274.13                  | 19067.23                | 12.22                              |
| NGTAO:0.5%    | 3495.11                    | 483.71                     | 1159.16                    | 2929.66                 | 308.83                  | 21789.99                | 13.32                              |
| NGTAO:1.0%    | 2970.34                    | 472.42                     | 1208.32                    | 2851.97                 | 367.1                   | 20820.06                | 13.58                              |
| NGTAO:1.5%    | 1430.18                    | 461.26                     | 516.12                     | 2884.80                 | 154.01                  | 21245.61                | 13.67                              |
| NGTAO:2.0%    | 1563.30                    | 488.50                     | 564.84                     | 2921.30                 | 160.88                  | 22202.17                | 14.12                              |

**Table S3.** The fitting parameters of NGTAO: Er<sup>3+</sup> decay curves.

| <b>Sample</b> | <b><math>\tau_1</math></b> | <b><math>B_1</math></b> | <b><math>\tau/\mu\text{s}</math></b> |
|---------------|----------------------------|-------------------------|--------------------------------------|
| NGTAO:0.1%    | 95.05                      | 5112.35                 | 95.05                                |
| NGTAO:0.5%    | 93.63                      | 4876.35                 | 93.63                                |
| NGTAO:1.0%    | 90.09                      | 4977.91                 | 90.09                                |
| NGTAO:1.5%    | 82.14                      | 4978.38                 | 82.14                                |
| NGTAO:2.0%    | 75.96                      | 4445.73                 | 75.96                                |
